# Supplementary material for: The start of migration correlates with arrival timing, and the total speed of migration increases with migration distance in migratory songbirds: a cross-continental analysis
Source: Mov Ecol. 2019 Aug 12;7:25. doi: 10.1186/s40462-019-0169-1 (PMC6689889; doi:10.1186/s40462-019-0169-1)
Supplement: Supplementary file 3 — All tracking data used for the analyses. (XLSX 60 kb) [file 40462_2019_169_MOESM3_ESM.xlsx]

## Sheet: Additional file 3 individual da
ID	sex	breed.lon	breed.lat	winter.lon	winter.lat	start_mig	end_mig	total.dur	t.speed	t.stop.dur	total.dist	season	birdGR	type	bodymass	ind	family
common cuckoo	m	13	54	13.9	-9.6	2010-08-08	2010-10-14	67	93	51	6261	aut	near-songbirds	sat	115	172	Cuculidae
common cuckoo	f	13	54	13.9	-9.6	2010-07-04	2010-11-18	137	51	110	7013	aut	near-songbirds	sat	115	173	Cuculidae
common cuckoo	m	13	54	13.9	-9.6	2010-07-01	2010-11-02	124	54	NA	6712	aut	near-songbirds	sat	115	174	Cuculidae
common cuckoo	f	13	54	13.9	-9.6	2010-07-18	2010-10-22	96	71	NA	6786	aut	near-songbirds	sat	115	175	Cuculidae
common cuckoo	m	13	54	13.9	-9.6	2010-07-06	2010-11-19	136	62	100	8378	aut	near-songbirds	sat	115	176	Cuculidae
common cuckoo	f	13	54	13.9	-9.6	2010-06-30	2010-11-05	128	59	105	7559	aut	near-songbirds	sat	115	177	Cuculidae
common cuckoo	m	13	54	13.9	-9.6	NA	NA	NA	NA	NA	NA	spr	near-songbirds	sat	115	172	Cuculidae
common cuckoo	f	13	54	13.9	-9.6	NA	NA	NA	NA	NA	NA	spr	near-songbirds	sat	115	173	Cuculidae
common cuckoo	m	13	54	13.9	-9.6	NA	NA	NA	NA	NA	NA	spr	near-songbirds	sat	115	174	Cuculidae
common cuckoo	f	13	54	13.9	-9.6	2011-01-30	2011-06-02	123	74	101	9100	spr	near-songbirds	sat	115	175	Cuculidae
common cuckoo	m	13	54	13.9	-9.6	2011-02-26	2011-05-17	80	122	52	9729	spr	near-songbirds	sat	115	176	Cuculidae
common cuckoo	f	13	54	13.9	-9.6	2011-01-28	2011-05-09	101	85	76	8578	spr	near-songbirds	sat	115	177	Cuculidae
European roller	m	-3	40	18.7	-18.5	2012-08-04	2012-12-01	119	80	81	9547	aut	near-songbirds	llg	143.5	500	Coraciidae
European roller	m	-3	40	18.7	-18.5	2012-09-06	2012-11-21	76	110	55	8338	aut	near-songbirds	llg	143.5	501	Coraciidae
European roller	m	-3	40	18.7	-18.5	2012-08-25	2012-10-24	100	101	63	10095	aut	near-songbirds	llg	143.5	502	Coraciidae
European roller	f	-3	40	18.7	-18.5	2012-08-04	2012-10-26	105	95	68	9986	aut	near-songbirds	llg	143.5	503	Coraciidae
European roller	m	-3	40	18.7	-18.5	2012-09-12	NA	NA	NA	NA	NA	aut	near-songbirds	llg	143.5	504	Coraciidae
European roller	m	-3	40	18.7	-18.5	2012-09-08	2012-11-19	105	86	77	8996	aut	near-songbirds	llg	143.5	505	Coraciidae
European roller	NA	-3	40	18.7	-18.5	2012-08-27	2012-10-21	78	111	38	8651	aut	near-songbirds	llg	143.5	506	Coraciidae
European roller	f	-3	40	18.7	-18.5	2012-07-21	2012-10-16	102	92	80	9380	aut	near-songbirds	llg	143.5	507	Coraciidae
European roller	f	-3	40	18.7	-18.5	2012-08-19	2012-10-29	82	116	60	9471	aut	near-songbirds	llg	143.5	508	Coraciidae
European roller	m	-3	40	18.7	-18.5	2012-07-21	2012-10-26	109	86	85	9406	aut	near-songbirds	llg	143.5	509	Coraciidae
European roller	f	-3	40	18.7	-18.5	2012-08-19	2012-11-01	92	95	54	8719	aut	near-songbirds	llg	143.5	510	Coraciidae
European roller	m	-3	40	18.7	-18.5	NA	NA	NA	NA	NA	NA	spr	near-songbirds	llg	143.5	500	Coraciidae
European roller	m	-3	40	18.7	-18.5	2013-03-10	2013-05-12	63	157	40	9884	spr	near-songbirds	llg	143.5	501	Coraciidae
European roller	m	-3	40	18.7	-18.5	NA	NA	NA	NA	NA	NA	spr	near-songbirds	llg	143.5	502	Coraciidae
European roller	f	-3	40	18.7	-18.5	NA	NA	NA	NA	NA	NA	spr	near-songbirds	llg	143.5	503	Coraciidae
European roller	m	-3	40	18.7	-18.5	NA	NA	NA	NA	NA	NA	spr	near-songbirds	llg	143.5	504	Coraciidae
European roller	m	-3	40	18.7	-18.5	NA	NA	NA	NA	NA	NA	spr	near-songbirds	llg	143.5	505	Coraciidae
European roller	NA	-3	40	18.7	-18.5	NA	NA	NA	NA	NA	NA	spr	near-songbirds	llg	143.5	506	Coraciidae
European roller	f	-3	40	18.7	-18.5	NA	NA	NA	NA	NA	NA	spr	near-songbirds	llg	143.5	507	Coraciidae
European roller	f	-3	40	18.7	-18.5	2013-02-23	2013-05-06	72	148	52	10679	spr	near-songbirds	llg	143.5	508	Coraciidae
European roller	m	-3	40	18.7	-18.5	2013-02-10	2013-04-14	63	138	45	8712	spr	near-songbirds	llg	143.5	509	Coraciidae
European roller	f	-3	40	18.7	-18.5	2013-04-01	2013-05-06	35	229	14	7999	spr	near-songbirds	llg	143.5	510	Coraciidae
eastern kingbird	m	-98.26	40.48	-65	-15	2010-09-07	2010-10-30	53	126	NA	6673	aut	songbirds	llg	41	4510	Tyrannidae
eastern kingbird	m	-98.26	40.48	-65	-15	2010-09-03	2010-10-28	55	128	NA	7052	aut	songbirds	llg	41	4511	Tyrannidae
eastern kingbird	m	-98.26	40.48	-65	-15	2010-09-09	2010-10-29	50	139	NA	6945	aut	songbirds	llg	41	4512	Tyrannidae
eastern kingbird	m	-98.26	40.48	-65	-15	2010-08-24	2010-10-16	53	122	NA	6442	aut	songbirds	llg	41	4513	Tyrannidae
eastern kingbird	m	-98.26	40.48	-65	-15	2010-09-02	2010-10-24	52	134	NA	6967	aut	songbirds	llg	41	4514	Tyrannidae
eastern kingbird	m	-98.26	40.48	-65	-15	2010-09-14	2010-09-24	NA	NA	NA	5319	aut	songbirds	llg	41	4515	Tyrannidae
eastern kingbird	m	-98.26	40.48	-65	-15	2010-09-06	2010-09-23	NA	NA	NA	5588	aut	songbirds	llg	41	4516	Tyrannidae
eastern kingbird	m	-98.26	40.48	-65	-15	2010-08-11	2010-10-06	56	116	NA	6510	aut	songbirds	llg	41	4517	Tyrannidae
eastern kingbird	m	-98.26	40.48	-65	-15	2011-04-18	2011-05-29	11	481	NA	5293	spr	songbirds	llg	41	4510	Tyrannidae
eastern kingbird	m	-98.26	40.48	-65	-15	2011-05-03	2011-05-28	25	225	NA	5616	spr	songbirds	llg	41	4511	Tyrannidae
eastern kingbird	m	-98.26	40.48	-65	-15	2011-04-21	2011-05-06	15	345	NA	5171	spr	songbirds	llg	41	4512	Tyrannidae
eastern kingbird	m	-98.26	40.48	-65	-15	2011-04-16	2011-04-28	42	123	NA	5177	spr	songbirds	llg	41	4513	Tyrannidae
eastern kingbird	m	-98.26	40.48	-65	-15	2011-04-26	2011-05-14	18	280	NA	5048	spr	songbirds	llg	41	4514	Tyrannidae
eastern kingbird	m	-98.26	40.48	-65	-15	2011-04-17	2011-05-10	53	100	NA	5319	spr	songbirds	llg	41	4515	Tyrannidae
eastern kingbird	m	-98.26	40.48	-65	-15	2011-04-23	2011-05-08	15	373	NA	5588	spr	songbirds	llg	41	4516	Tyrannidae
eastern kingbird	m	-98.26	40.48	-65	-15	2011-04-04	2011-04-30	26	184	NA	4779	spr	songbirds	llg	41	4517	Tyrannidae
western kingbird	f	-98.3	34.4	-90	14	2011-07-30	2011-08-04	5	309	NA	1547	aut	songbirds	llg	37.5	4540	Tyrannidae
western kingbird	f	-98.3	34.4	-90	14	2011-07-29	2011-08-07	9	145	NA	1306	aut	songbirds	llg	37.5	4541	Tyrannidae
western kingbird	f	-98.3	34.4	-90	14	2011-07-17	2011-07-23	6	251	NA	1507	aut	songbirds	llg	37.5	4542	Tyrannidae
western kingbird	f	-98.3	34.4	-90	14	2011-07-26	2011-07-30	4	389	NA	1555	aut	songbirds	llg	37.5	4543	Tyrannidae
western kingbird	f	-98.3	34.4	-90	14	2011-07-17	2011-07-30	13	120	NA	1560	aut	songbirds	llg	37.5	4544	Tyrannidae
western kingbird	f	-98.3	34.4	-90	14	2011-07-26	2011-08-01	6	220	NA	1320	aut	songbirds	llg	37.5	4545	Tyrannidae
western kingbird	m	-98.3	34.4	-90	14	NA	2011-07-25	NA	NA	NA	1371	aut	songbirds	llg	37.5	4546	Tyrannidae
western kingbird	m	-98.3	34.4	-90	14	2011-07-28	2011-08-04	7	205	NA	1433	aut	songbirds	llg	37.5	4547	Tyrannidae
western kingbird	m	-98.3	34.4	-90	14	2011-07-13	2011-07-18	5	277	NA	1383	aut	songbirds	llg	37.5	4548	Tyrannidae
western kingbird	m	-98.3	34.4	-90	14	2011-07-21	2011-08-05	15	94	NA	1417	aut	songbirds	llg	37.5	4549	Tyrannidae
western kingbird	m	-98.3	34.4	-90	14	2011-07-17	2011-07-25	8	178	NA	1421	aut	songbirds	llg	37.5	4550	Tyrannidae
western kingbird	m	-98.3	34.4	-90	14	2011-07-28	2011-07-31	NA	NA	NA	1230	aut	songbirds	llg	37.5	4551	Tyrannidae
western kingbird	m	-98.3	34.4	-90	14	NA	2011-07-31	NA	NA	NA	1640	aut	songbirds	llg	37.5	4552	Tyrannidae
western kingbird	m	-98.3	34.4	-90	14	NA	2011-07-20	NA	NA	NA	1396	aut	songbirds	llg	37.5	4553	Tyrannidae
western kingbird	f	-98.3	34.4	-90	14	2012-04-27	NA	NA	NA	NA	2337	spr	songbirds	llg	37.5	4540	Tyrannidae
western kingbird	f	-98.3	34.4	-90	14	NA	2012-05-02	NA	NA	NA	2074	spr	songbirds	llg	37.5	4541	Tyrannidae
western kingbird	f	-98.3	34.4	-90	14	2012-04-24	2012-05-05	11	230	NA	2531	spr	songbirds	llg	37.5	4542	Tyrannidae
western kingbird	f	-98.3	34.4	-90	14	2012-04-24	2012-05-05	11	NA	NA	NA	spr	songbirds	llg	37.5	4543	Tyrannidae
western kingbird	f	-98.3	34.4	-90	14	2012-04-14	2012-04-26	12	NA	NA	NA	spr	songbirds	llg	37.5	4544	Tyrannidae
western kingbird	f	-98.3	34.4	-90	14	2012-04-23	2012-05-09	16	NA	NA	NA	spr	songbirds	llg	37.5	4545	Tyrannidae
western kingbird	m	-98.3	34.4	-90	14	2012-04-20	2012-05-28	8	326	NA	2608	spr	songbirds	llg	37.5	4546	Tyrannidae
western kingbird	m	-98.3	34.4	-90	14	NA	NA	NA	NA	NA	2338	spr	songbirds	llg	37.5	4547	Tyrannidae
western kingbird	m	-98.3	34.4	-90	14	NA	NA	NA	NA	NA	NA	spr	songbirds	llg	37.5	4548	Tyrannidae
western kingbird	m	-98.3	34.4	-90	14	2012-04-06	NA	NA	NA	NA	NA	spr	songbirds	llg	37.5	4549	Tyrannidae
western kingbird	m	-98.3	34.4	-90	14	2012-04-05	NA	NA	NA	NA	NA	spr	songbirds	llg	37.5	4550	Tyrannidae
western kingbird	m	-98.3	34.4	-90	14	2012-04-23	NA	NA	NA	NA	NA	spr	songbirds	llg	37.5	4551	Tyrannidae
western kingbird	m	-98.3	34.4	-90	14	2012-04-17	NA	NA	NA	NA	NA	spr	songbirds	llg	37.5	4552	Tyrannidae
western kingbird	m	-98.3	34.4	-90	14	2012-04-10	2012-04-18	8	NA	NA	NA	spr	songbirds	llg	37.5	4553	Tyrannidae
scissor-tailed flycatcher	f	-98.3	34.4	-87	15	2011-10-21	2011-10-27	6	430	NA	2577	aut	songbirds	llg	39.5	4560	Tyrannidae
scissor-tailed flycatcher	f	-98.3	34.4	-87	15	2011-10-22	2011-11-01	10	252	NA	2515	aut	songbirds	llg	39.5	4561	Tyrannidae
scissor-tailed flycatcher	f	-98.3	34.4	-87	15	2011-11-02	2011-11-17	9	NA	NA	NA	aut	songbirds	llg	39.5	4562	Tyrannidae
scissor-tailed flycatcher	m	-98.3	34.4	-87	15	2011-10-18	2011-11-04	16	169	NA	2704	aut	songbirds	llg	39.5	4563	Tyrannidae
scissor-tailed flycatcher	f	-98.3	34.4	-87	15	2011-10-20	2011-10-27	7	NA	NA	NA	aut	songbirds	llg	39.5	4564	Tyrannidae
scissor-tailed flycatcher	f	-98.3	34.4	-87	15	2012-04-09	NA	NA	NA	NA	2577	spr	songbirds	llg	39.5	4560	Tyrannidae
scissor-tailed flycatcher	f	-98.3	34.4	-87	15	2012-04-11	2012-04-17	6	419	NA	2515	spr	songbirds	llg	39.5	4561	Tyrannidae
scissor-tailed flycatcher	f	-98.3	34.4	-87	15	2012-04-06	2012-04-16	10	NA	NA	NA	spr	songbirds	llg	39.5	4562	Tyrannidae
scissor-tailed flycatcher	m	-98.3	34.4	-87	15	2012-03-29	NA	NA	NA	NA	2704	spr	songbirds	llg	39.5	4563	Tyrannidae
scissor-tailed flycatcher	f	-98.3	34.4	-87	15	2012-03-25	NA	NA	NA	NA	NA	spr	songbirds	llg	39.5	4564	Tyrannidae
red-eyed vireo	m	-79.9	41.8	-65	0	NA	2011-10-14	NA	NA	NA	4746.01	aut	songbirds	llg	18.55	3510	Vireonidae
red-eyed vireo	m	-79.9	41.8	-65	0	NA	2011-10-21	NA	NA	NA	4676.42	aut	songbirds	llg	18.55	3511	Vireonidae
red-eyed vireo	m	-79.9	41.8	-65	0	NA	2011-10-14	NA	NA	NA	5140.85	aut	songbirds	llg	18.55	3512	Vireonidae
red-eyed vireo	m	-79.9	41.8	-65	0	2011-09-04	2011-10-21	47	112	NA	5264.47	aut	songbirds	llg	18.55	3513	Vireonidae
red-eyed vireo	m	-79.9	41.8	-65	0	NA	2011-10-23	NA	NA	NA	4838.79	aut	songbirds	llg	18.55	3514	Vireonidae
red-eyed vireo	m	-79.9	41.8	-65	0	NA	2011-10-15	NA	NA	NA	4796.5	aut	songbirds	llg	18.55	3515	Vireonidae
red-eyed vireo	m	-79.9	41.8	-65	0	NA	2011-11-04	NA	NA	NA	4593.64	aut	songbirds	llg	18.55	3516	Vireonidae
red-eyed vireo	m	-79.9	41.8	-65	0	NA	2011-10-23	NA	NA	NA	4123.97	aut	songbirds	llg	18.55	3517	Vireonidae
red-eyed vireo	m	-79.9	41.8	-65	0	NA	2011-10-29	NA	NA	NA	5237.81	aut	songbirds	llg	18.55	3518	Vireonidae
red-eyed vireo	m	-79.9	41.8	-65	0	NA	NA	NA	NA	NA	4717	aut	songbirds	llg	18.55	3519	Vireonidae
red-eyed vireo	m	-79.9	41.8	-65	0	2012-03-14	2012-05-03	50	95	41	4746.01	spr	songbirds	llg	18.55	3510	Vireonidae
red-eyed vireo	m	-79.9	41.8	-65	0	2012-03-15	2012-05-04	50	94	31	4676.42	spr	songbirds	llg	18.55	3511	Vireonidae
red-eyed vireo	m	-79.9	41.8	-65	0	2012-03-18	2012-05-09	52	99	30	5140.85	spr	songbirds	llg	18.55	3512	Vireonidae
red-eyed vireo	m	-79.9	41.8	-65	0	2012-03-19	2012-05-09	51	103	35	5264.47	spr	songbirds	llg	18.55	3513	Vireonidae
red-eyed vireo	m	-79.9	41.8	-65	0	2012-03-29	2012-05-09	41	118	27	4838.79	spr	songbirds	llg	18.55	3514	Vireonidae
red-eyed vireo	m	-79.9	41.8	-65	0	2012-03-30	2012-05-12	43	112	20	4796.5	spr	songbirds	llg	18.55	3515	Vireonidae
red-eyed vireo	m	-79.9	41.8	-65	0	2012-03-04	2012-05-16	47	98	28	4593.64	spr	songbirds	llg	18.55	3516	Vireonidae
red-eyed vireo	m	-79.9	41.8	-65	0	2012-03-31	2012-05-13	43	96	23	4123.97	spr	songbirds	llg	18.55	3517	Vireonidae
red-eyed vireo	m	-79.9	41.8	-65	0	2012-04-05	2012-05-18	43	122	27	5237.81	spr	songbirds	llg	18.55	3518	Vireonidae
red-eyed vireo	m	-79.9	41.8	-65	0	2012-03-31	2012-05-08	NA	NA	NA	4717	spr	songbirds	llg	18.55	3519	Vireonidae
red-backed shrike	m	14	56	21.7	-20.8	2009-07-26	2009-11-04	101	99	59	10040	aut	songbirds	llg	28.25	1	Laniidae
red-backed shrike	m	14	56	21.7	-20.8	2009-08-06	2009-11-12	98	102	73	10044	aut	songbirds	llg	28.25	2	Laniidae
red-backed shrike	f	14	56	21.7	-20.8	2009-08-19	2009-11-25	98	101	70	9926	aut	songbirds	llg	28.25	3	Laniidae
red-backed shrike	m	14	56	21.7	-20.8	2009-08-17	2009-11-20	95	91	77	8663	aut	songbirds	llg	28.25	4	Laniidae
red-backed shrike	f	14	56	21.7	-20.8	2009-08-19	2009-11-28	101	88	69	8916	aut	songbirds	llg	28.25	5	Laniidae
red-backed shrike	m	14	56	21.7	-20.8	2009-08-13	2009-11-28	107	98	85	10442	aut	songbirds	llg	28.25	6	Laniidae
red-backed shrike	f	14	56	21.7	-20.8	2009-08-12	2009-11-13	93	108	65	10055	aut	songbirds	llg	28.25	7	Laniidae
red-backed shrike	m	14	56	21.7	-20.8	2009-08-22	2009-11-12	82	114	63	9320	aut	songbirds	llg	28.25	8	Laniidae
red-backed shrike	f	14	56	21.7	-20.8	2009-08-24	2009-12-09	107	94	75	10067	aut	songbirds	llg	28.25	9	Laniidae
red-backed shrike	m	14	56	21.7	-20.8	2010-03-07	2010-04-29	53	223	11	11822	spr	songbirds	llg	28.25	1	Laniidae
red-backed shrike	m	14	56	21.7	-20.8	2010-03-23	2010-05-26	64	189	6	12111	spr	songbirds	llg	28.25	2	Laniidae
red-backed shrike	f	14	56	21.7	-20.8	2010-03-17	2010-05-27	71	176	7	12488	spr	songbirds	llg	28.25	3	Laniidae
red-backed shrike	m	14	56	21.7	-20.8	2010-04-05	NA	NA	NA	NA	NA	spr	songbirds	llg	28.25	4	Laniidae
red-backed shrike	f	14	56	21.7	-20.8	2010-04-13	NA	NA	NA	NA	NA	spr	songbirds	llg	28.25	5	Laniidae
red-backed shrike	m	14	56	21.7	-20.8	2010-04-05	2010-06-05	61	189	16	11541	spr	songbirds	llg	28.25	6	Laniidae
red-backed shrike	f	14	56	21.7	-20.8	2010-04-03	2010-06-03	61	191	13	11643	spr	songbirds	llg	28.25	7	Laniidae
red-backed shrike	m	14	56	21.7	-20.8	2010-04-02	NA	NA	NA	NA	NA	spr	songbirds	llg	28.25	8	Laniidae
red-backed shrike	f	14	56	21.7	-20.8	2010-04-02	2010-06-08	67	173	13	11567	spr	songbirds	llg	28.25	9	Laniidae
great reed warbler	m	15.4	59.1667	-6.64	11.94	2009-08-07	2009-09-16	39.5	157	27	6213	aut	songbirds	llg	27.2	101	Acrocephalidae
great reed warbler	m	15.4	59.1667	10.88	14.21	2009-08-06	2009-09-21	46.5	120	31.5	5600	aut	songbirds	llg	27.2	102	Acrocephalidae
great reed warbler	m	15.4	59.1667	3.76	13.85	2009-08-14	2009-09-29	46.5	123	30	5734	aut	songbirds	llg	27.2	103	Acrocephalidae
great reed warbler	m	15.4	59.1667	13.25	14.2	2009-08-03	2009-08-29	26	232	18.5	6029	aut	songbirds	llg	27.2	104	Acrocephalidae
great reed warbler	m	15.4	59.1667	6.16	12.17	2009-07-30	2009-09-08	40.5	182	26.5	7373	aut	songbirds	llg	27.2	105	Acrocephalidae
great reed warbler	m	15.4	59.1667	0.13	8.58	2009-07-31	2009-09-17	48.5	145	29	7029	aut	songbirds	llg	27.2	106	Acrocephalidae
great reed warbler	m	15.4	59.1667	NA	NA	2009-08-06	NA	NA	NA	NA	NA	aut	songbirds	llg	27.2	107	Acrocephalidae
great reed warbler	m	15.4	59.1667	8.22	15.23	2009-07-30	2009-09-12	45	136	26	6115	aut	songbirds	llg	27.2	108	Acrocephalidae
great reed warbler	m	15.4	59.1667	-4.56	12.32	2008-07-30	2008-09-01	33	188	12.5	6196	aut	songbirds	llg	27.2	109	Acrocephalidae
great reed warbler	m	15.4	59.1667	NA	NA	2008-07-27	NA	NA	NA	NA	NA	aut	songbirds	llg	27.2	110	Acrocephalidae
great reed warbler	m	15.4	59.1667	-6.64	11.94	2010-04-19	2010-05-20	32	224	16.5	7177	spr	songbirds	llg	27.2	101	Acrocephalidae
great reed warbler	m	15.4	59.1667	10.88	14.21	2010-04-01	2010-05-05	34.5	198	10	6831	spr	songbirds	llg	27.2	102	Acrocephalidae
great reed warbler	m	15.4	59.1667	3.76	13.85	2010-04-21	2010-05-21	31	193	19	5996	spr	songbirds	llg	27.2	103	Acrocephalidae
great reed warbler	m	15.4	59.1667	13.25	14.2	2010-04-03	2010-05-05	32	256	18	8179	spr	songbirds	llg	27.2	104	Acrocephalidae
great reed warbler	m	15.4	59.1667	6.16	12.17	2010-04-27	2010-05-29	33	236	6.5	7783	spr	songbirds	llg	27.2	105	Acrocephalidae
great reed warbler	m	15.4	59.1667	0.13	8.58	2010-04-05	2010-05-05	31	211	9.5	6531	spr	songbirds	llg	27.2	106	Acrocephalidae
great reed warbler	m	15.4	59.1667	NA	NA	NA	NA	NA	NA	NA	NA	spr	songbirds	llg	27.2	107	Acrocephalidae
great reed warbler	m	15.4	59.1667	8.22	15.23	NA	NA	NA	NA	NA	NA	spr	songbirds	llg	27.2	108	Acrocephalidae
great reed warbler	m	15.4	59.1667	-4.56	12.32	NA	NA	NA	NA	NA	NA	spr	songbirds	llg	27.2	109	Acrocephalidae
great reed warbler	m	15.4	59.1667	NA	NA	NA	NA	NA	NA	NA	NA	spr	songbirds	llg	27.2	110	Acrocephalidae
barn swallow	m	-85.4	32.6	-49.68	0.22	2012-07-27	2012-08-23	27	230	NA	6198	aut	songbirds	llg	20	4800	Hirundinidae
barn swallow	f	-65.3	45.9	-39.34	-11.98	2012-08-25	2012-11-03	70	156	NA	10908	aut	songbirds	llg	20	4801	Hirundinidae
barn swallow	f	-65.3	45.9	-65.95	-22.76	2012-08-18	2012-10-29	72	139	NA	9999	aut	songbirds	llg	20	4802	Hirundinidae
barn swallow	m	-65.3	45.9	-46.38	-23.88	2013-07-27	2013-10-31	96	115	NA	11035	aut	songbirds	llg	20	4803	Hirundinidae
barn swallow	f	-65.3	45.9	-48.74	-2.74	2013-08-08	2013-11-03	87	97	NA	8415	aut	songbirds	llg	20	4804	Hirundinidae
barn swallow	f	-65.3	45.9	-42.19	-2.42	2013-07-25	2013-11-02	100	108	NA	10829	aut	songbirds	llg	20	4805	Hirundinidae
barn swallow	f	-65.3	45.9	-47.82	-20.48	2013-08-28	2013-10-13	46	215	NA	9908	aut	songbirds	llg	20	4806	Hirundinidae
barn swallow	f	-65.3	45.9	-61.87	-29.33	2013-07-24	2013-10-10	78	140	NA	10918	aut	songbirds	llg	20	4807	Hirundinidae
barn swallow	f	-65.3	45.9	-65.47	-15.85	2013-09-17	2013-11-18	62	190	NA	11760	aut	songbirds	llg	20	4808	Hirundinidae
barn swallow	m	-65.3	45.9	-50.24	-21.95	2013-08-18	2013-10-10	53	191	NA	10139	aut	songbirds	llg	20	4809	Hirundinidae
barn swallow	m	-65.3	45.9	-47.45	-19.01	2013-08-25	2013-10-05	41	252	NA	10316	aut	songbirds	llg	20	4810	Hirundinidae
barn swallow	m	-80.2	43.8	-54.75	-19.5	2011-08-28	2011-11-08	72	138	NA	9912	aut	songbirds	llg	20	4811	Hirundinidae
barn swallow	f	-80.2	43.8	-65.11	-13.56	2011-08-28	2011-10-03	36	201	NA	7242	aut	songbirds	llg	20	4812	Hirundinidae
barn swallow	f	-80.2	43.8	-46.08	-22.19	2011-08-28	2011-10-03	36	257	NA	9268	aut	songbirds	llg	20	4813	Hirundinidae
barn swallow	f	-106.1	53.6	-82.43	9.21	2012-07-14	2012-12-07	146	57	NA	8371	aut	songbirds	llg	20	4814	Hirundinidae
barn swallow	m	-106.1	53.6	-76.11	6.93	2011-09-10	2011-12-07	88	88	NA	7715	aut	songbirds	llg	20	4815	Hirundinidae
barn swallow	f	-106.1	53.6	-77.4	6.19	2011-08-25	2011-12-04	101	81	NA	8211	aut	songbirds	llg	20	4816	Hirundinidae
barn swallow	f	-106.1	53.6	-90.36	12.87	2013-08-26	2013-11-06	72	86	NA	6160	aut	songbirds	llg	20	4817	Hirundinidae
barn swallow	m	-106.1	53.6	-73.58	8.23	2012-08-23	2012-12-10	109	77	NA	8445	aut	songbirds	llg	20	4818	Hirundinidae
barn swallow	m	-122.4	47.7	-86.88	13.72	2012-08-29	2012-11-17	80	82	NA	6598	aut	songbirds	llg	20	4819	Hirundinidae
barn swallow	m	-122.4	47.7	-78.27	9.03	2011-09-25	2011-12-07	73	102	NA	7465	aut	songbirds	llg	20	4820	Hirundinidae
barn swallow	f	-122.4	47.7	-107.68	25.67	2011-09-29	2011-10-27	28	133	NA	3728	aut	songbirds	llg	20	4821	Hirundinidae
barn swallow	m	-122.4	47.7	-102.86	21.11	2013-10-02	2013-10-20	18	263	NA	4731	aut	songbirds	llg	20	4822	Hirundinidae
barn swallow	m	-122.4	47.7	-103.29	21.36	2013-10-10	2013-11-27	48	92	NA	4394	aut	songbirds	llg	20	4823	Hirundinidae
barn swallow	m	-122.4	47.7	-122	42.55	2013-08-30	2013-11-11	73	11	NA	806	aut	songbirds	llg	20	4824	Hirundinidae
barn swallow	NA	-122.4	47.7	-101.81	19.01	2013-08-31	2013-11-21	82	57	NA	4688	aut	songbirds	llg	20	4825	Hirundinidae
barn swallow	m	-122.4	47.7	-90.89	15.12	2013-09-29	2013-11-17	49	123	NA	6029	aut	songbirds	llg	20	4826	Hirundinidae
barn swallow	m	-85.4	32.6	-49.68	0.22	2013-02-18	2013-05-09	80	86	NA	6920	spr	songbirds	llg	20	4800	Hirundinidae
barn swallow	f	-65.3	45.9	-39.34	-11.98	NA	NA	NA	NA	NA	NA	spr	songbirds	llg	20	4801	Hirundinidae
barn swallow	f	-65.3	45.9	-65.95	-22.76	NA	NA	NA	NA	NA	NA	spr	songbirds	llg	20	4802	Hirundinidae
barn swallow	m	-65.3	45.9	-46.38	-23.88	2014-03-14	NA	NA	NA	NA	NA	spr	songbirds	llg	20	4803	Hirundinidae
barn swallow	f	-65.3	45.9	-48.74	-2.74	2014-03-26	2014-05-20	55	182	NA	10001	spr	songbirds	llg	20	4804	Hirundinidae
barn swallow	f	-65.3	45.9	-42.19	-2.42	2014-03-29	2014-05-03	35	271	NA	9488	spr	songbirds	llg	20	4805	Hirundinidae
barn swallow	f	-65.3	45.9	-47.82	-20.48	2014-03-28	2014-05-25	58	235	NA	13619	spr	songbirds	llg	20	4806	Hirundinidae
barn swallow	f	-65.3	45.9	-61.87	-29.33	2014-03-30	2014-05-08	39	341	NA	13317	spr	songbirds	llg	20	4807	Hirundinidae
barn swallow	f	-65.3	45.9	-65.47	-15.85	2014-03-27	2014-05-11	45	223	NA	10014	spr	songbirds	llg	20	4808	Hirundinidae
barn swallow	m	-65.3	45.9	-50.24	-21.95	NA	NA	NA	NA	NA	NA	spr	songbirds	llg	20	4809	Hirundinidae
barn swallow	m	-65.3	45.9	-47.45	-19.01	2014-03-24	NA	NA	NA	NA	NA	spr	songbirds	llg	20	4810	Hirundinidae
barn swallow	m	-80.2	43.8	-54.75	-19.5	2012-03-26	2012-05-20	55	197	NA	10829	spr	songbirds	llg	20	4811	Hirundinidae
barn swallow	f	-80.2	43.8	-65.11	-13.56	2012-04-06	NA	NA	NA	NA	9748	spr	songbirds	llg	20	4812	Hirundinidae
barn swallow	f	-80.2	43.8	-46.08	-22.19	2012-03-15	NA	NA	NA	NA	9822	spr	songbirds	llg	20	4813	Hirundinidae
barn swallow	f	-106.1	53.6	-82.43	9.21	2013-04-21	NA	NA	NA	NA	NA	spr	songbirds	llg	20	4814	Hirundinidae
barn swallow	m	-106.1	53.6	-76.11	6.93	2012-05-03	2012-05-25	22	346	NA	7617	spr	songbirds	llg	20	4815	Hirundinidae
barn swallow	f	-106.1	53.6	-77.4	6.19	2012-04-22	2012-05-17	25	314	NA	7844	spr	songbirds	llg	20	4816	Hirundinidae
barn swallow	f	-106.1	53.6	-90.36	12.87	2014-04-23	2014-05-09	16	403	NA	6447	spr	songbirds	llg	20	4817	Hirundinidae
barn swallow	m	-106.1	53.6	-73.58	8.23	2013-04-30	2013-05-20	20	410	NA	8196	spr	songbirds	llg	20	4818	Hirundinidae
barn swallow	m	-122.4	47.7	-86.88	13.72	2013-04-19	2013-05-14	25	255	NA	6382	spr	songbirds	llg	20	4819	Hirundinidae
barn swallow	m	-122.4	47.7	-78.27	9.03	2012-04-10	2012-05-01	21	351	NA	7376	spr	songbirds	llg	20	4820	Hirundinidae
barn swallow	f	-122.4	47.7	-107.68	25.67	2012-03-29	2012-04-22	24	152	NA	3655	spr	songbirds	llg	20	4821	Hirundinidae
barn swallow	m	-122.4	47.7	-102.86	21.11	2014-03-29	2014-04-09	11	402	NA	4418	spr	songbirds	llg	20	4822	Hirundinidae
barn swallow	m	-122.4	47.7	-103.29	21.36	2014-03-29	NA	NA	NA	NA	NA	spr	songbirds	llg	20	4823	Hirundinidae
barn swallow	m	-122.4	47.7	-122	42.55	2014-03-05	2014-04-11	37	22	NA	806	spr	songbirds	llg	20	4824	Hirundinidae
barn swallow	NA	-122.4	47.7	-101.81	19.01	2014-03-28	NA	NA	NA	NA	NA	spr	songbirds	llg	20	4825	Hirundinidae
barn swallow	m	-122.4	47.7	-90.89	15.12	2014-04-29	NA	NA	NA	NA	NA	spr	songbirds	llg	20	4826	Hirundinidae
wood thrush	m	-79.9333	41.7667	-84.4	14.2	NA	2007-12-04	58	NA	49	NA	aut	songbirds	llg	60	62	Turidae
wood thrush	m	-79.9333	41.7667	-84.4	14.2	NA	2007-11-10	35	NA	20	NA	aut	songbirds	llg	60	63	Turidae
wood thrush	m	-79.9333	41.7667	-84.4	14.2	NA	2007-10-30	24	NA	18	NA	aut	songbirds	llg	60	64	Turidae
wood thrush	f	-79.9333	41.7667	-84.4	14.2	NA	2007-10-30	24	NA	15	NA	aut	songbirds	llg	60	65	Turidae
wood thrush	m	-79.9333	41.7667	-84.4	14.2	NA	2007-11-07	32	NA	16	NA	aut	songbirds	llg	60	66	Turidae
wood thrush	m	-79.9333	41.7667	-84.4	14.2	2008-04-13	2008-04-26	14	271	NA	3800	spr	songbirds	llg	60	62	Turidae
wood thrush	m	-79.9333	41.7667	-84.4	14.2	2008-04-13	2008-04-27	15	233	NA	3500	spr	songbirds	llg	60	63	Turidae
wood thrush	m	-79.9333	41.7667	-84.4	14.2	2008-04-22	2008-05-03	13	269	4	3500	spr	songbirds	llg	60	64	Turidae
wood thrush	f	-79.9333	41.7667	-84.4	14.2	2008-04-28	2008-05-26	29	159	13	4600	spr	songbirds	llg	60	65	Turidae
wood thrush	m	-79.9333	41.7667	-84.4	14.2	2008-04-13	2008-04-26	14	279	5	3900	spr	songbirds	llg	60	66	Turidae
Swainsons thrush	m	-122	50	-75	9.6	2010-07-15	2010-10-17	94	37	83	3470	aut	songbirds	llg	35	55178	Turidae
Swainsons thrush	m	-122	50	-75	9.6	2010-07-25	2010-10-18	85	51	54	4366	aut	songbirds	llg	35	55179	Turidae
Swainsons thrush	m	-122	50	-75	9.6	2010-07-28	2010-10-14	78	48	71	3759	aut	songbirds	llg	35	55180	Turidae
Swainsons thrush	m	-122	50	-75	9.6	2010-07-24	2010-10-20	88	51	72	4466	aut	songbirds	llg	35	55181	Turidae
Swainsons thrush	m	-122	50	-75	9.6	2010-07-26	2010-10-02	68	60	35	4067	aut	songbirds	llg	35	55182	Turidae
Swainsons thrush	m	-122	50	-75	9.6	2010-10-02	2010-10-25	23	242	16	5573	aut	songbirds	llg	35	55183	Turidae
Swainsons thrush	m	-122	50	-75	9.6	2010-07-31	2010-11-27	119	46	98	5468	aut	songbirds	llg	35	55184	Turidae
Swainsons thrush	m	-122	50	-75	9.6	2010-07-30	2010-11-03	96	63	85	6081	aut	songbirds	llg	35	55185	Turidae
Swainsons thrush	m	-122	50	-75	9.6	2010-07-31	2010-10-17	78	71	66	5519	aut	songbirds	llg	35	55186	Turidae
Swainsons thrush	m	-122	50	-75	9.6	2010-08-28	2010-10-08	41	125	32	5122	aut	songbirds	llg	35	55187	Turidae
Swainsons thrush	m	-122	50	-75	9.6	2010-09-29	2010-11-13	45	177	37	7967	aut	songbirds	llg	35	55188	Turidae
Swainsons thrush	m	-122	50	-75	9.6	2010-09-11	2010-10-25	44	144	35	6339	aut	songbirds	llg	35	55189	Turidae
Swainsons thrush	m	-122	50	-75	9.6	2010-08-05	2010-10-13	69	92	62	6379	aut	songbirds	llg	35	55190	Turidae
Swainsons thrush	m	-122	50	-75	9.6	2010-07-18	2010-10-10	84	77	73	6489	aut	songbirds	llg	35	55191	Turidae
Swainsons thrush	m	-122	50	-75	9.6	2010-08-28	2010-10-09	40	185	34	7393	aut	songbirds	llg	35	55192	Turidae
Swainsons thrush	m	-122	50	-75	9.6	2010-08-08	2010-10-24	77	66	55	5072	aut	songbirds	llg	35	55193	Turidae
Swainsons thrush	m	-122	50	-75	9.6	2010-08-08	2010-11-06	90	53	77	4755	aut	songbirds	llg	35	55194	Turidae
Swainsons thrush	m	-122	50	-75	9.6	2010-08-08	2010-10-22	75	73	63	5438	aut	songbirds	llg	35	55195	Turidae
Swainsons thrush	m	-122	50	-75	9.6	2010-07-11	2010-10-24	105	46	64	4798	aut	songbirds	llg	35	55196	Turidae
Swainsons thrush	m	-122	50	-75	9.6	2010-08-12	2010-11-21	101	73	83	7352	aut	songbirds	llg	35	55197	Turidae
Swainsons thrush	m	-122	50	-75	9.6	2010-08-02	2010-11-02	92	77	79	7129	aut	songbirds	llg	35	55198	Turidae
Swainsons thrush	m	-122	50	-75	9.6	2010-07-24	2010-10-25	93	74	86	6857	aut	songbirds	llg	35	55199	Turidae
Swainsons thrush	m	-122	50	-75	9.6	2010-08-05	2010-11-28	115	59	104	6766	aut	songbirds	llg	35	55200	Turidae
Swainsons thrush	m	-122	50	-75	9.6	2010-08-03	2010-10-17	75	102	58	7671	aut	songbirds	llg	35	55201	Turidae
Swainsons thrush	m	-122	50	-75	9.6	2010-08-02	2010-10-23	82	79	77	6470	aut	songbirds	llg	35	55202	Turidae
Swainsons thrush	m	-122	50	-75	9.6	2010-08-03	2010-11-04	93	58	72	5425	aut	songbirds	llg	35	55203	Turidae
Swainsons thrush	m	-122	50	-75	9.6	2010-08-22	2010-10-16	55	102	45	5626	aut	songbirds	llg	35	55204	Turidae
Swainsons thrush	m	-122	50	-75	9.6	2010-08-05	2010-10-11	67	81	57	5448	aut	songbirds	llg	35	55205	Turidae
Swainsons thrush	m	-122	50	-75	9.6	2010-09-14	2010-10-16	32	236	26	7558	aut	songbirds	llg	35	55206	Turidae
Swainsons thrush	m	-122	50	-75	9.6	2010-08-04	2010-10-23	80	72	72	5742	aut	songbirds	llg	35	55207	Turidae
Swainsons thrush	m	-122	50	-75	9.6	2011-04-16	2011-06-01	46	92	31	4253	spr	songbirds	llg	35	55178	Turidae
Swainsons thrush	m	-122	50	-75	9.6	2011-04-06	2011-05-28	52	85	39	4441	spr	songbirds	llg	35	55179	Turidae
Swainsons thrush	m	-122	50	-75	9.6	2011-04-18	2011-05-23	36	127	21	4564	spr	songbirds	llg	35	55180	Turidae
Swainsons thrush	m	-122	50	-75	9.6	2011-04-01	NA	NA	NA	NA	NA	spr	songbirds	llg	35	55181	Turidae
Swainsons thrush	m	-122	50	-75	9.6	2011-04-11	2011-05-17	36	112	28	4041	spr	songbirds	llg	35	55182	Turidae
Swainsons thrush	m	-122	50	-75	9.6	2011-04-11	2011-06-07	57	98	43	5559	spr	songbirds	llg	35	55183	Turidae
Swainsons thrush	m	-122	50	-75	9.6	2011-03-26	2011-06-09	75	74	57	5552	spr	songbirds	llg	35	55184	Turidae
Swainsons thrush	m	-122	50	-75	9.6	2011-04-04	2011-06-06	63	101	38	6333	spr	songbirds	llg	35	55185	Turidae
Swainsons thrush	m	-122	50	-75	9.6	2011-04-07	2011-05-22	45	135	31	6083	spr	songbirds	llg	35	55186	Turidae
Swainsons thrush	m	-122	50	-75	9.6	2011-04-10	2011-05-21	41	135	32	5532	spr	songbirds	llg	35	55187	Turidae
Swainsons thrush	m	-122	50	-75	9.6	2011-04-15	2011-06-06	52	144	43	7495	spr	songbirds	llg	35	55188	Turidae
Swainsons thrush	m	-122	50	-75	9.6	2011-03-30	2011-05-25	56	138	40	7708	spr	songbirds	llg	35	55189	Turidae
Swainsons thrush	m	-122	50	-75	9.6	2011-04-14	2011-05-24	40	185	29	7390	spr	songbirds	llg	35	55190	Turidae
Swainsons thrush	m	-122	50	-75	9.6	2011-03-24	2011-05-27	64	113	53	7221	spr	songbirds	llg	35	55191	Turidae
Swainsons thrush	m	-122	50	-75	9.6	2011-04-01	2011-05-31	60	131	49	7848	spr	songbirds	llg	35	55192	Turidae
Swainsons thrush	m	-122	50	-75	9.6	2011-04-12	2011-06-08	57	107	42	6077	spr	songbirds	llg	35	55193	Turidae
Swainsons thrush	m	-122	50	-75	9.6	2011-04-18	2011-05-29	41	135	32	5537	spr	songbirds	llg	35	55194	Turidae
Swainsons thrush	m	-122	50	-75	9.6	2011-03-27	2011-05-20	54	124	42	6697	spr	songbirds	llg	35	55195	Turidae
Swainsons thrush	m	-122	50	-75	9.6	2011-03-22	2011-05-20	59	108	44	6390	spr	songbirds	llg	35	55196	Turidae
Swainsons thrush	m	-122	50	-75	9.6	2011-04-13	2011-05-27	44	160	33	7020	spr	songbirds	llg	35	55197	Turidae
Swainsons thrush	m	-122	50	-75	9.6	2011-03-31	2011-05-23	53	137	44	7256	spr	songbirds	llg	35	55198	Turidae
Swainsons thrush	m	-122	50	-75	9.6	2011-04-13	2011-05-25	42	173	26	7254	spr	songbirds	llg	35	55199	Turidae
Swainsons thrush	m	-122	50	-75	9.6	2011-04-13	2011-06-05	53	138	39	7321	spr	songbirds	llg	35	55200	Turidae
Swainsons thrush	m	-122	50	-75	9.6	2011-03-30	2011-05-25	56	133	44	7428	spr	songbirds	llg	35	55201	Turidae
Swainsons thrush	m	-122	50	-75	9.6	2011-03-21	2011-05-27	67	97	59	6478	spr	songbirds	llg	35	55202	Turidae
Swainsons thrush	m	-122	50	-75	9.6	2011-04-23	2011-06-03	41	134	30	5512	spr	songbirds	llg	35	55203	Turidae
Swainsons thrush	m	-122	50	-75	9.6	2011-04-12	2011-05-28	46	154	32	7083	spr	songbirds	llg	35	55204	Turidae
Swainsons thrush	m	-122	50	-75	9.6	2011-03-11	2011-05-30	80	72	74	5773	spr	songbirds	llg	35	55205	Turidae
Swainsons thrush	m	-122	50	-75	9.6	2011-04-15	2011-05-31	46	154	37	7087	spr	songbirds	llg	35	55206	Turidae
Swainsons thrush	m	-122	50	-75	9.6	2011-04-10	2011-05-26	46	131	39	6024	spr	songbirds	llg	35	55207	Turidae
Swainsons thrush	m	-123	49.3	-75	9.6	2010-07-12	2010-10-17	94	37	83	3470	aut	songbirds	llg	35	9206	Turidae
Swainsons thrush	m	-123	49.3	-75	9.6	2010-07-25	2010-10-18	85	51	54	4366	aut	songbirds	llg	35	9207	Turidae
Swainsons thrush	m	-123	49.3	-75	9.6	2010-07-28	2010-10-14	78	48	71	3759	aut	songbirds	llg	35	9208	Turidae
Swainsons thrush	m	-123	49.3	-75	9.6	2010-07-24	2010-10-20	88	51	72	4466	aut	songbirds	llg	35	9209	Turidae
Swainsons thrush	m	-123	49.3	-75	9.6	2010-07-26	2010-10-02	68	60	35	4067	aut	songbirds	llg	35	9210	Turidae
Swainsons thrush	m	-123	49.3	-75	9.6	2010-07-31	2010-11-27	119	46	98	5468	aut	songbirds	llg	35	9211	Turidae
Swainsons thrush	m	-123	49.3	-75	9.6	2010-07-20	2010-11-03	96	63	85	6081	aut	songbirds	llg	35	9212	Turidae
Swainsons thrush	m	-123	49.3	-75	9.6	2010-07-31	2010-10-17	78	71	66	5519	aut	songbirds	llg	35	9213	Turidae
Swainsons thrush	m	-123	49.3	-75	9.6	2010-08-28	2010-10-28	41	125	32	5122	aut	songbirds	llg	35	9214	Turidae
Swainsons thrush	m	-123	49.3	-75	9.6	2011-04-16	2011-06-01	46	92	31	4253	spr	songbirds	llg	35	9206	Turidae
Swainsons thrush	m	-123	49.3	-75	9.6	2011-04-06	2011-05-28	52	85	39	4441	spr	songbirds	llg	35	9207	Turidae
Swainsons thrush	m	-123	49.3	-75	9.6	2011-04-18	2011-05-23	36	127	21	4564	spr	songbirds	llg	35	9208	Turidae
Swainsons thrush	m	-123	49.3	-75	9.6	2011-04-01	NA	NA	NA	NA	NA	spr	songbirds	llg	35	9209	Turidae
Swainsons thrush	m	-123	49.3	-75	9.6	2011-04-11	2011-05-17	36	112	28	4041	spr	songbirds	llg	35	9210	Turidae
Swainsons thrush	m	-123	49.3	-75	9.6	2011-03-26	2011-06-09	75	74	57	5552	spr	songbirds	llg	35	9211	Turidae
Swainsons thrush	m	-123	49.3	-75	9.6	2011-04-04	2011-06-06	63	101	38	6333	spr	songbirds	llg	35	9212	Turidae
Swainsons thrush	m	-123	49.3	-75	9.6	2011-04-07	2011-05-22	45	135	31	6083	spr	songbirds	llg	35	9213	Turidae
Swainsons thrush	m	-123	49.3	-75	9.6	2011-04-10	2011-05-21	41	135	32	5532	spr	songbirds	llg	35	9214	Turidae
veery	m	-75.5	39.4	-57.4	9	2009-08-27	2009-11-24	88	74	40	6481	aut	songbirds	llg	34	235	Turidae
veery	m	-75.5	39.4	-57.4	9	NA	2009-11-08	NA	NA	NA	5022	aut	songbirds	llg	34	236	Turidae
veery	m	-75.5	39.4	-57.4	9	2009-08-27	2009-11-02	67	105	18	7041	aut	songbirds	llg	34	237	Turidae
veery	m	-75.5	39.4	-57.4	9	2009-08-27	2009-11-16	81	89	15	7215	aut	songbirds	llg	34	238	Turidae
veery	m	-75.5	39.4	-57.4	9	NA	2009-12-02	NA	NA	NA	6320	aut	songbirds	llg	34	239	Turidae
veery	m	-75.5	39.4	-57.4	9	2010-04-13	2010-05-15	33	209	24	6885	spr	songbirds	llg	34	235	Turidae
veery	m	-75.5	39.4	-57.4	9	2010-04-13	2010-05-07	25	272	15	6800	spr	songbirds	llg	34	236	Turidae
veery	m	-75.5	39.4	-57.4	9	2010-04-09	2010-05-05	27	271	17	7323	spr	songbirds	llg	34	237	Turidae
veery	m	-75.5	39.4	-57.4	9	2010-04-13	2010-05-29	17	350	0	5950	spr	songbirds	llg	34	238	Turidae
veery	m	-75.5	39.4	-57.4	9	2010-04-20	2011-05-20	31	332	14	10290	spr	songbirds	llg	34	239	Turidae
Stejneger's stonechat	m	141	43	106	17.25	2014-10-07	2014-11-19	43	87	35.5	3758.9	aut	songbirds	llg	15	243	Muscicapidae
Stejneger's stonechat	m	141	43	106	17.25	2014-10-10	2014-12-09	60.1	70	53.1	4230.8	aut	songbirds	llg	15	244	Muscicapidae
Stejneger's stonechat	m	141	43	106	17.25	2014-10-13	2014-12-14	62.1	89	54.1	5557.4	aut	songbirds	llg	15	245	Muscicapidae
Stejneger's stonechat	m	141	43	106	17.25	2014-09-28	2014-11-28	61	86	52.5	5274.3	aut	songbirds	llg	15	246	Muscicapidae
Stejneger's stonechat	m	141	43	106	17.25	2014-09-29	2014-11-19	51	72	43.5	3689.3	aut	songbirds	llg	15	247	Muscicapidae
Stejneger's stonechat	m	141	43	106	17.25	2014-10-26	2014-12-29	64	79	56	5035.7	aut	songbirds	llg	15	248	Muscicapidae
Stejneger's stonechat	m	141	43	106	17.25	2014-10-07	2014-12-02	56	107	46	5965.3	aut	songbirds	llg	15	249	Muscicapidae
Stejneger's stonechat	m	141	43	106	17.25	2014-10-09	2014-11-22	44	118	35.5	5202.8	aut	songbirds	llg	15	250	Muscicapidae
Stejneger's stonechat	m	141	43	106	17.25	2014-10-14	2014-12-09	56	87	47.5	4896.3	aut	songbirds	llg	15	251	Muscicapidae
Stejneger's stonechat	m	141	43	106	17.25	2014-10-02	2014-12-11	70	79	57.5	5497.2	aut	songbirds	llg	15	252	Muscicapidae
Stejneger's stonechat	m	141	43	106	17.25	2014-10-06	2014-11-22	47	108	38	5054.8	aut	songbirds	llg	15	253	Muscicapidae
Stejneger's stonechat	m	141	43	106	17.25	2014-10-15	2014-11-26	42	125	29.5	5242.9	aut	songbirds	llg	15	254	Muscicapidae
northern wheatear AK	m	-146	66	35	5.6	2009-08-04	2009-11-14	102	151.5	45	15453	aut	songbirds	llg	25.5	255	Muscicapidae
northern wheatear AK	m	-146	66	35	5.6	2009-08-20	2009-11-10	82	163.1	33	13375	aut	songbirds	llg	25.5	256	Muscicapidae
northern wheatear AK	m	-146	66	35	5.6	2009-08-16	2009-11-12	88	173.4	38	15261	aut	songbirds	llg	25.5	257	Muscicapidae
northern wheatear AK	m	-146	66	35	5.6	2013-08-13	2013-11-11	89	181.1	38	16121	aut	songbirds	llg	25.5	258	Muscicapidae
northern wheatear AK	m	-146	66	35	5.6	2013-08-04	2013-11-03	91	135.6	45	12344	aut	songbirds	llg	25.5	259	Muscicapidae
northern wheatear AK	m	-146	66	35	5.6	2013-08-17	2013-11-18	93	139.4	53	12961	aut	songbirds	llg	25.5	260	Muscicapidae
northern wheatear AK	m	-146	66	35	5.6	2013-08-09	2013-11-10	94	186.8	43	17556	aut	songbirds	llg	25.5	261	Muscicapidae
northern wheatear AK	m	-146	66	35	5.6	2013-08-15	2013-11-27	104	146.6	60	15244	aut	songbirds	llg	25.5	262	Muscicapidae
northern wheatear AK	m	-146	66	35	5.6	2010-04-07	NA	NA	261.7	7	5496	spr	songbirds	llg	25.5	255	Muscicapidae
northern wheatear AK	m	-146	66	35	5.6	2010-04-03	NA	NA	178.5	18	6427	spr	songbirds	llg	25.5	256	Muscicapidae
northern wheatear AK	m	-146	66	35	5.6	2010-03-30	NA	NA	165.7	25	6131	spr	songbirds	llg	25.5	257	Muscicapidae
northern wheatear AK	m	-146	66	35	5.6	2014-04-14	NA	NA	324.4	9	9733	spr	songbirds	llg	25.5	258	Muscicapidae
northern wheatear AK	m	-146	66	35	5.6	2014-04-09	NA	NA	271.1	7	9758	spr	songbirds	llg	25.5	259	Muscicapidae
northern wheatear AK	m	-146	66	35	5.6	2014-03-29	NA	NA	182.3	18	8288	spr	songbirds	llg	25.5	260	Muscicapidae
northern wheatear AK	m	-146	66	35	5.6	2014-03-30	NA	NA	159.9	20	7196	spr	songbirds	llg	25.5	261	Muscicapidae
northern wheatear AK	m	-146	66	35	5.6	2014-03-24	NA	NA	198	26	10296	spr	songbirds	llg	25.5	262	Muscicapidae
northern wheatear SE	m	17.8333	59.8333	-4.7	14.5	2010-08-15	2010-10-19	65	83	53	5370	aut	songbirds	llg	25.5	1516	Muscicapidae
northern wheatear SE	f	17.8333	59.8333	-4.7	14.5	2010-08-10	2010-10-19	70	74	57	5153	aut	songbirds	llg	25.5	1517	Muscicapidae
northern wheatear SE	f	17.8333	59.8333	-4.7	14.5	2010-08-15	2010-10-20	66	75	56	4939	aut	songbirds	llg	25.5	1518	Muscicapidae
northern wheatear SE	f	17.8333	59.8333	-4.7	14.5	2010-08-23	2010-10-20	58	90	47	5206	aut	songbirds	llg	25.5	1519	Muscicapidae
northern wheatear SE	f	17.8333	59.8333	-4.7	14.5	2011-08-17	2011-10-13	57	91	46	5186	aut	songbirds	llg	25.5	1520	Muscicapidae
northern wheatear SE	f	17.8333	59.8333	-4.7	14.5	2011-08-19	2011-10-26	68	73	53	4936	aut	songbirds	llg	25.5	1521	Muscicapidae
northern wheatear SE	m	17.8333	59.8333	-4.7	14.5	2011-08-18	2011-10-07	50	101	44	5061	aut	songbirds	llg	25.5	1522	Muscicapidae
northern wheatear SE	f	17.8333	59.8333	-4.7	14.5	2011-08-18	2011-10-11	54	97	43	5216	aut	songbirds	llg	25.5	1523	Muscicapidae
northern wheatear SE	m	17.8333	59.8333	-4.7	14.5	2011-08-18	2011-10-06	49	107	39	5223	aut	songbirds	llg	25.5	1524	Muscicapidae
northern wheatear SE	m	17.8333	59.8333	-4.7	14.5	2012-08-05	2012-10-10	66	77	57	5100	aut	songbirds	llg	25.5	1525	Muscicapidae
northern wheatear SE	m	17.8333	59.8333	-4.7	14.5	2012-08-29	2012-10-26	58	93	48	5371	aut	songbirds	llg	25.5	1526	Muscicapidae
northern wheatear SE	m	17.8333	59.8333	-4.7	14.5	2012-08-01	2012-10-12	72	72	57	5185	aut	songbirds	llg	25.5	1527	Muscicapidae
northern wheatear SE	m	17.8333	59.8333	-4.7	14.5	2011-03-09	2011-04-12	34	157	22	5331	spr	songbirds	llg	25.5	1516	Muscicapidae
northern wheatear SE	f	17.8333	59.8333	-4.7	14.5	2011-03-03	2011-04-20	48	111	42	5313	spr	songbirds	llg	25.5	1517	Muscicapidae
northern wheatear SE	f	17.8333	59.8333	-4.7	14.5	2011-03-26	2011-04-25	30	174	24	5212	spr	songbirds	llg	25.5	1518	Muscicapidae
northern wheatear SE	f	17.8333	59.8333	-4.7	14.5	2011-03-22	2011-05-08	47	111	36	5206	spr	songbirds	llg	25.5	1519	Muscicapidae
northern wheatear SE	f	17.8333	59.8333	-4.7	14.5	2012-03-20	2012-04-24	35	155	26	5427	spr	songbirds	llg	25.5	1520	Muscicapidae
northern wheatear SE	f	17.8333	59.8333	-4.7	14.5	2012-03-29	2012-04-23	25	213	20	5329	spr	songbirds	llg	25.5	1521	Muscicapidae
northern wheatear SE	m	17.8333	59.8333	-4.7	14.5	2012-03-17	2012-04-24	38	130	29	4923	spr	songbirds	llg	25.5	1522	Muscicapidae
northern wheatear SE	f	17.8333	59.8333	-4.7	14.5	2012-03-18	2012-04-23	36	152	28	5477	spr	songbirds	llg	25.5	1523	Muscicapidae
northern wheatear SE	m	17.8333	59.8333	-4.7	14.5	2012-03-18	2012-04-15	27	196	21	5285	spr	songbirds	llg	25.5	1524	Muscicapidae
northern wheatear SE	m	17.8333	59.8333	-4.7	14.5	2013-03-12	2013-05-08	26	203	19	5266	spr	songbirds	llg	25.5	1525	Muscicapidae
northern wheatear SE	m	17.8333	59.8333	-4.7	14.5	2013-03-19	2013-04-21	33	169	23	5573	spr	songbirds	llg	25.5	1526	Muscicapidae
northern wheatear SE	m	17.8333	59.8333	-4.7	14.5	2013-03-02	2013-04-22	20	231	14	4617	spr	songbirds	llg	25.5	1527	Muscicapidae
semicollared flycatcher	f	-3	40	33	-5	2013-07-30	2013-10-11	73	70	NA	5119	aut	songbirds	llg	12.6	1500	Muscicapidae
semicollared flycatcher	m	-3	40	33	-5	2013-07-21	2013-09-20	61	94	NA	5706	aut	songbirds	llg	12.6	1501	Muscicapidae
semicollared flycatcher	m	-3	40	33	-5	2013-07-24	2013-11-09	108	49	NA	5315	aut	songbirds	llg	12.6	1502	Muscicapidae
semicollared flycatcher	f	-3	40	33	-5	2013-07-24	2013-10-14	82	74	NA	6030	aut	songbirds	llg	12.6	1503	Muscicapidae
semicollared flycatcher	m	-3	40	33	-5	2013-07-24	2013-10-17	85	65	NA	5525	aut	songbirds	llg	12.6	1504	Muscicapidae
semicollared flycatcher	f	-3	40	33	-5	2014-07-09	2014-10-08	91	56	NA	5066	aut	songbirds	llg	12.6	1505	Muscicapidae
semicollared flycatcher	m	-3	40	33	-5	2014-07-12	2014-10-06	86	80	NA	6903	aut	songbirds	llg	12.6	1506	Muscicapidae
semicollared flycatcher	m	-3	40	33	-5	2014-07-21	2014-10-03	104	56	NA	5858	aut	songbirds	llg	12.6	1507	Muscicapidae
semicollared flycatcher	m	-3	40	33	-5	2014-07-12	2014-09-30	80	85	NA	6812	aut	songbirds	llg	12.6	1508	Muscicapidae
semicollared flycatcher	m	-3	40	33	-5	2014-07-31	2014-11-05	97	62	NA	6013	aut	songbirds	llg	12.6	1509	Muscicapidae
semicollared flycatcher	f	-3	40	33	-5	2014-07-20	2014-10-09	81	64	NA	5181	aut	songbirds	llg	12.6	1510	Muscicapidae
semicollared flycatcher	f	-3	40	33	-5	2014-02-21	2014-04-10	48	104	NA	5013	spr	songbirds	llg	12.6	1500	Muscicapidae
semicollared flycatcher	m	-3	40	33	-5	2014-02-22	2014-03-26	32	185	NA	5912	spr	songbirds	llg	12.6	1501	Muscicapidae
semicollared flycatcher	m	-3	40	33	-5	2014-02-07	2014-03-30	51	106	NA	5415	spr	songbirds	llg	12.6	1502	Muscicapidae
semicollared flycatcher	f	-3	40	33	-5	2014-02-22	2014-04-06	43	125	NA	5376	spr	songbirds	llg	12.6	1503	Muscicapidae
semicollared flycatcher	m	-3	40	33	-5	2014-02-17	NA	NA	NA	NA	5622	spr	songbirds	llg	12.6	1504	Muscicapidae
semicollared flycatcher	f	-3	40	33	-5	2014-02-20	2014-04-18	57	92	NA	5248	spr	songbirds	llg	12.6	1505	Muscicapidae
semicollared flycatcher	m	-3	40	33	-5	2014-02-18	2014-04-09	50	113	NA	5674	spr	songbirds	llg	12.6	1506	Muscicapidae
semicollared flycatcher	m	-3	40	33	-5	2014-02-10	2014-04-11	60	89	NA	5322	spr	songbirds	llg	12.6	1507	Muscicapidae
semicollared flycatcher	m	-3	40	33	-5	2014-02-14	2014-04-10	55	105	NA	5792	spr	songbirds	llg	12.6	1508	Muscicapidae
semicollared flycatcher	m	-3	40	33	-5	2014-03-03	2014-04-11	39	129	NA	5025	spr	songbirds	llg	12.6	1509	Muscicapidae
semicollared flycatcher	f	-3	40	33	-5	2014-02-10	2014-04-09	58	92	NA	5325	spr	songbirds	llg	12.6	1510	Muscicapidae
pied flycatcher	m	22.2	60.2	-8	9	2011-08-17	2011-10-03	47	134	NA	6305	aut	songbirds	llg	15.95	4700	Muscicapidae
pied flycatcher	m	22.2	60.2	-8	9	2011-08-25	2011-10-17	53	119	NA	6305	aut	songbirds	llg	15.95	4701	Muscicapidae
pied flycatcher	m	22.2	60.2	-8	9	2011-08-28	2011-10-05	38	166	NA	6305	aut	songbirds	llg	15.95	4702	Muscicapidae
pied flycatcher	m	22.2	60.2	-8	9	2011-08-28	2011-10-04	37	170	NA	6305	aut	songbirds	llg	15.95	4703	Muscicapidae
pied flycatcher	m	10.6	60	-8	9	2012-08-16	2012-10-14	59	99	NA	5860	aut	songbirds	llg	15.95	4704	Muscicapidae
pied flycatcher	m	6.4	52.8	-8	9	2011-08-02	2011-08-31	29	173	NA	5018	aut	songbirds	llg	15.95	4705	Muscicapidae
pied flycatcher	m	6.4	52.8	-8	9	2011-08-13	2011-09-22	40	125	NA	5018	aut	songbirds	llg	15.95	4706	Muscicapidae
pied flycatcher	m	6.4	52.8	-8	9	2011-08-14	2011-10-29	76	66	NA	5018	aut	songbirds	llg	15.95	4707	Muscicapidae
pied flycatcher	m	6.4	52.8	-8	9	2011-08-05	2011-09-03	29	173	NA	5018	aut	songbirds	llg	15.95	4708	Muscicapidae
pied flycatcher	m	6.4	52.8	-8	9	2012-08-08	2012-09-04	27	186	NA	5018	aut	songbirds	llg	15.95	4709	Muscicapidae
pied flycatcher	m	6.4	52.8	-8	9	2012-07-27	2012-09-02	37	136	NA	5018	aut	songbirds	llg	15.95	4710	Muscicapidae
pied flycatcher	m	6.4	52.8	-8	9	2012-08-13	2012-09-17	35	143	NA	5018	aut	songbirds	llg	15.95	4711	Muscicapidae
pied flycatcher	m	-3.7	50.6	-8	9	2012-08-19	2012-09-21	33	140	NA	4630	aut	songbirds	llg	15.95	4712	Muscicapidae
pied flycatcher	m	-3.7	50.6	-8	9	2012-08-20	2012-09-24	35	132	NA	4630	aut	songbirds	llg	15.95	4713	Muscicapidae
pied flycatcher	m	22.2	60.2	-8	9	2012-04-10	2012-04-27	17	371	NA	6305	spr	songbirds	llg	15.95	4700	Muscicapidae
pied flycatcher	m	22.2	60.2	-8	9	NA	NA	NA	NA	NA	6305	spr	songbirds	llg	15.95	4701	Muscicapidae
pied flycatcher	m	22.2	60.2	-8	9	NA	NA	NA	NA	NA	6305	spr	songbirds	llg	15.95	4702	Muscicapidae
pied flycatcher	m	22.2	60.2	-8	9	2012-04-14	2012-05-03	19	332	NA	6305	spr	songbirds	llg	15.95	4703	Muscicapidae
pied flycatcher	m	10.6	60	-8	9	2013-04-15	NA	NA	NA	NA	5860	spr	songbirds	llg	15.95	4704	Muscicapidae
pied flycatcher	m	6.4	52.8	-8	9	NA	NA	NA	NA	NA	5018	spr	songbirds	llg	15.95	4705	Muscicapidae
pied flycatcher	m	6.4	52.8	-8	9	2012-04-06	2012-04-30	24	209	NA	5018	spr	songbirds	llg	15.95	4706	Muscicapidae
pied flycatcher	m	6.4	52.8	-8	9	2012-04-05	2012-04-20	15	335	NA	5018	spr	songbirds	llg	15.95	4707	Muscicapidae
pied flycatcher	m	6.4	52.8	-8	9	NA	NA	NA	NA	NA	5018	spr	songbirds	llg	15.95	4708	Muscicapidae
pied flycatcher	m	6.4	52.8	-8	9	NA	NA	NA	NA	NA	5018	spr	songbirds	llg	15.95	4709	Muscicapidae
pied flycatcher	m	6.4	52.8	-8	9	2013-03-31	2013-04-16	16	314	NA	5018	spr	songbirds	llg	15.95	4710	Muscicapidae
pied flycatcher	m	6.4	52.8	-8	9	2013-04-03	2013-04-15	12	418	NA	5018	spr	songbirds	llg	15.95	4711	Muscicapidae
pied flycatcher	m	-3.7	50.6	-8	9	2013-03-26	2013-04-13	18	257	NA	4630	spr	songbirds	llg	15.95	4712	Muscicapidae
pied flycatcher	m	-3.7	50.6	-8	9	2013-03-29	2013-04-14	16	289	NA	4630	spr	songbirds	llg	15.95	4713	Muscicapidae
chestnut-cheeked starling	m	139.183	37.9667	119	5.7	2012-09-20	2012-10-09	19	238	NA	4514.5	aut	songbirds	llg	50	9720	Sturnidae
chestnut-cheeked starling	m	139.183	37.9667	119	5.7	2012-09-04	2012-10-14	40	117	NA	4680.54	aut	songbirds	llg	50	9721	Sturnidae
chestnut-cheeked starling	f	139.183	37.9667	119	5.7	2012-09-03	2012-10-10	37	96	NA	3545.94	aut	songbirds	llg	50	9722	Sturnidae
chestnut-cheeked starling	m	139.183	37.9667	119	5.7	2012-09-17	2012-10-09	22	169	NA	3725.72	aut	songbirds	llg	50	9723	Sturnidae
chestnut-cheeked starling	m	139.183	37.9667	119	5.7	2012-09-28	2012-10-16	18	251	NA	4512.58	aut	songbirds	llg	50	9724	Sturnidae
chestnut-cheeked starling	f	139.183	37.9667	119	5.7	2012-09-02	2012-10-16	44	108	NA	4766.55	aut	songbirds	llg	50	9725	Sturnidae
chestnut-cheeked starling	f	139.183	37.9667	119	5.7	2012-09-04	2012-10-15	41	109	NA	4483.67	aut	songbirds	llg	50	9726	Sturnidae
chestnut-cheeked starling	f	139.183	37.9667	119	5.7	2012-09-07	2012-10-13	36	133	NA	4773.37	aut	songbirds	llg	50	9727	Sturnidae
chestnut-cheeked starling	f	139.183	37.9667	119	5.7	2012-09-06	2012-10-15	39	122	NA	4752.92	aut	songbirds	llg	50	9728	Sturnidae
chestnut-cheeked starling	m	139.183	37.9667	119	5.7	2012-09-12	2012-10-15	33	135	NA	4447.51	aut	songbirds	llg	50	9729	Sturnidae
chestnut-cheeked starling	f	139.183	37.9667	119	5.7	2012-09-18	2012-10-10	22	213	NA	4686.87	aut	songbirds	llg	50	9730	Sturnidae
chestnut-cheeked starling	f	139.183	37.9667	119	5.7	2012-09-09	2012-10-22	43	78	NA	3369.51	aut	songbirds	llg	50	9731	Sturnidae
chestnut-cheeked starling	f	139.183	37.9667	119	5.7	2012-09-04	2012-10-06	32	99	NA	3168.22	aut	songbirds	llg	50	9732	Sturnidae
chestnut-cheeked starling	f	139.183	37.9667	119	5.7	2012-09-08	2012-10-06	28	116	NA	3260.37	aut	songbirds	llg	50	9733	Sturnidae
chestnut-cheeked starling	f	139.183	37.9667	119	5.7	2012-09-09	2012-10-06	27	128	NA	3445.1	aut	songbirds	llg	50	9734	Sturnidae
chestnut-cheeked starling	f	139.183	37.9667	119	5.7	2012-09-09	2012-10-08	29	124	NA	3609.6	aut	songbirds	llg	50	9735	Sturnidae
chestnut-cheeked starling	m	139.183	37.9667	119	5.7	2013-03-29	2013-04-26	28	161	NA	4514.5	spr	songbirds	llg	50	9720	Sturnidae
chestnut-cheeked starling	m	139.183	37.9667	119	5.7	2013-03-21	2013-04-22	32	146	NA	4680.54	spr	songbirds	llg	50	9721	Sturnidae
chestnut-cheeked starling	f	139.183	37.9667	119	5.7	2013-03-22	2013-04-10	19	187	NA	3545.94	spr	songbirds	llg	50	9722	Sturnidae
chestnut-cheeked starling	m	139.183	37.9667	119	5.7	2013-03-27	2013-04-25	29	128	NA	3725.72	spr	songbirds	llg	50	9723	Sturnidae
chestnut-cheeked starling	m	139.183	37.9667	119	5.7	NA	NA	NA	NA	NA	4512.58	spr	songbirds	llg	50	9724	Sturnidae
chestnut-cheeked starling	f	139.183	37.9667	119	5.7	NA	NA	NA	NA	NA	4766.55	spr	songbirds	llg	50	9725	Sturnidae
chestnut-cheeked starling	f	139.183	37.9667	119	5.7	NA	NA	NA	NA	NA	4483.67	spr	songbirds	llg	50	9726	Sturnidae
chestnut-cheeked starling	f	139.183	37.9667	119	5.7	NA	NA	NA	NA	NA	4773.37	spr	songbirds	llg	50	9727	Sturnidae
chestnut-cheeked starling	f	139.183	37.9667	119	5.7	NA	NA	NA	NA	NA	4752.92	spr	songbirds	llg	50	9728	Sturnidae
chestnut-cheeked starling	m	139.183	37.9667	119	5.7	NA	NA	NA	NA	NA	4447.51	spr	songbirds	llg	50	9729	Sturnidae
chestnut-cheeked starling	f	139.183	37.9667	119	5.7	NA	NA	NA	NA	NA	4686.87	spr	songbirds	llg	50	9730	Sturnidae
chestnut-cheeked starling	f	139.183	37.9667	119	5.7	NA	NA	NA	NA	NA	3369.51	spr	songbirds	llg	50	9731	Sturnidae
chestnut-cheeked starling	f	139.183	37.9667	119	5.7	NA	NA	NA	NA	NA	3168.22	spr	songbirds	llg	50	9732	Sturnidae
chestnut-cheeked starling	f	139.183	37.9667	119	5.7	NA	NA	NA	NA	NA	3260.37	spr	songbirds	llg	50	9733	Sturnidae
chestnut-cheeked starling	f	139.183	37.9667	119	5.7	NA	NA	NA	NA	NA	3445.1	spr	songbirds	llg	50	9734	Sturnidae
chestnut-cheeked starling	f	139.183	37.9667	119	5.7	NA	NA	NA	NA	NA	3609.6	spr	songbirds	llg	50	9735	Sturnidae
tawny pipit	m	13.8333	50.5	-8	15	2013-08-30	2013-10-15	46	88	NA	4060	aut	songbirds	llg	24.5	9991510	Motacillidae
tawny pipit	m	13.8333	50.5	-8	15	2013-08-18	2013-09-30	43	113	NA	4840	aut	songbirds	llg	24.5	9991511	Motacillidae
tawny pipit	m	13.8333	50.5	-8	15	2013-08-12	2013-10-25	74	54	NA	4000	aut	songbirds	llg	24.5	9991512	Motacillidae
tawny pipit	m	13.8333	50.5	-8	15	2013-08-09	2013-09-24	46	94	NA	4320	aut	songbirds	llg	24.5	9991513	Motacillidae
tawny pipit	m	13.8333	50.5	-8	15	2013-08-06	2013-09-23	48	84	NA	4040	aut	songbirds	llg	24.5	9991514	Motacillidae
tawny pipit	f	13.8333	50.5	-8	15	2013-07-24	2013-08-17	55	75	NA	4140	aut	songbirds	llg	24.5	9991515	Motacillidae
tawny pipit	m	13.8333	50.5	-8	15	2014-02-09	2014-05-21	42	106	NA	4470	spr	songbirds	llg	24.5	9991510	Motacillidae
tawny pipit	m	13.8333	50.5	-8	15	2014-03-08	2014-04-22	45	103	NA	4640	spr	songbirds	llg	24.5	9991511	Motacillidae
tawny pipit	m	13.8333	50.5	-8	15	2014-03-23	NA	NA	NA	NA	4420	spr	songbirds	llg	24.5	9991512	Motacillidae
tawny pipit	m	13.8333	50.5	-8	15	NA	NA	NA	NA	NA	4320	spr	songbirds	llg	24.5	9991513	Motacillidae
tawny pipit	m	13.8333	50.5	-8	15	2014-03-18	2014-05-07	50	90	NA	4480	spr	songbirds	llg	24.5	9991514	Motacillidae
tawny pipit	f	13.8333	50.5	-8	15	2014-04-20	NA	18	248	NA	4460	spr	songbirds	llg	24.5	9991515	Motacillidae
linnet	m	7.88	54.18	-1.5	42.3	2013-08-23	2013-11-24	93	11	NA	1058.47	aut	songbirds	llg	20	9740	Fringillidae
linnet	m	7.88	54.18	-1.5	42.3	2013-08-23	2013-11-19	88	17	NA	1456.75	aut	songbirds	llg	20	9741	Fringillidae
linnet	m	7.88	54.18	-1.5	42.3	2013-10-07	2013-11-15	39	29	NA	1128.94	aut	songbirds	llg	20	9742	Fringillidae
linnet	m	7.88	54.18	-1.5	42.3	2014-09-23	2014-11-24	62	23	NA	1396.39	aut	songbirds	llg	20	9743	Fringillidae
linnet	m	7.88	54.18	-1.5	42.3	2014-10-06	2014-11-18	43	32	NA	1382.92	aut	songbirds	llg	20	9744	Fringillidae
linnet	f	7.88	54.18	-1.5	42.3	2014-09-08	2014-11-27	80	31	NA	2513.08	aut	songbirds	llg	20	9745	Fringillidae
linnet	m	7.88	54.18	-1.5	42.3	2014-02-22	2014-04-12	49	22	NA	1058.47	spr	songbirds	llg	20	9740	Fringillidae
linnet	m	7.88	54.18	-1.5	42.3	2014-02-17	NA	NA	NA	NA	1456.75	spr	songbirds	llg	20	9741	Fringillidae
linnet	m	7.88	54.18	-1.5	42.3	2014-03-01	2014-04-27	57	20	NA	1128.94	spr	songbirds	llg	20	9742	Fringillidae
linnet	m	7.88	54.18	-1.5	42.3	2015-02-03	2015-04-19	75	19	NA	1396.39	spr	songbirds	llg	20	9743	Fringillidae
linnet	m	7.88	54.18	-1.5	42.3	2015-02-04	2015-04-20	75	18	NA	1382.92	spr	songbirds	llg	20	9744	Fringillidae
linnet	f	7.88	54.18	-1.5	42.3	2015-02-14	2015-04-19	64	39	NA	2513.08	spr	songbirds	llg	20	9745	Fringillidae
ortolan bunting	m	20	63	-10.5	13.5	2012-08-31	2012-10-22	54	112	40.6	6054.06	aut	songbirds	llg	22.55	2221520	Emberizidae
ortolan bunting	m	20	63	-10.5	13.5	2012-08-26	2012-10-16	53	116	47	6147.44	aut	songbirds	llg	22.55	2221521	Emberizidae
ortolan bunting	m	20	63	-10.5	13.5	2012-08-19	2012-10-16	60	99	57	5934.88	aut	songbirds	llg	22.55	2221522	Emberizidae
ortolan bunting	m	20	63	-10.5	13.5	2012-08-24	2012-10-14	53	119	47	6320.42	aut	songbirds	llg	22.55	2221523	Emberizidae
ortolan bunting	m	20	63	-10.5	13.5	2012-08-18	2012-10-21	66	81	52	5358.54	aut	songbirds	llg	22.55	2221524	Emberizidae
ortolan bunting	m	20	63	-10.5	13.5	2012-08-10	2012-10-08	61	107	52	6550	aut	songbirds	llg	22.55	2221525	Emberizidae
ortolan bunting	m	20	63	-10.5	13.5	2013-03-22	2013-05-16	57	106	49.6	6054.06	spr	songbirds	llg	22.55	2221520	Emberizidae
ortolan bunting	m	20	63	-10.5	13.5	2013-04-04	2013-05-15	43	143	37	6147.44	spr	songbirds	llg	22.55	2221521	Emberizidae
ortolan bunting	m	20	63	-10.5	13.5	2013-04-05	2013-05-13	40	148	33	5934.88	spr	songbirds	llg	22.55	2221522	Emberizidae
ortolan bunting	m	20	63	-10.5	13.5	2013-04-15	2013-05-18	35	181	33	6320.42	spr	songbirds	llg	22.55	2221523	Emberizidae
ortolan bunting	m	20	63	-10.5	13.5	2013-04-09	2013-05-16	39	137	32	5358.54	spr	songbirds	llg	22.55	2221524	Emberizidae
ortolan bunting	m	20	63	-10.5	13.5	2013-04-08	2013-05-17	41	160	35	6550	spr	songbirds	llg	22.55	2221525	Emberizidae
snow bunting	m	-81.74	64.01	-106	50.3	2011-09-22	2011-10-25	34	88	26	3000	aut	songbirds	llg	37	9700	Emberizidae
snow bunting	f	-81.74	64.01	-106	50.3	2011-09-20	2011-10-24	35	83	28	2900	aut	songbirds	llg	37	9701	Emberizidae
snow bunting	f	-81.74	64.01	-106	50.3	2011-09-17	2011-10-30	44	69	36	3050	aut	songbirds	llg	37	9702	Emberizidae
snow bunting	f	-81.74	64.01	-106	50.3	2011-10-02	2011-11-06	36	81	24	2900	aut	songbirds	llg	37	9703	Emberizidae
snow bunting	m	-81.74	64.01	-106	50.3	2011-10-01	2011-11-04	35	80	25	2800	aut	songbirds	llg	37	9704	Emberizidae
snow bunting	f	-81.74	64.01	-106	50.3	2011-10-08	2011-11-04	28	96	22	2700	aut	songbirds	llg	37	9705	Emberizidae
snow bunting	m	-81.74	64.01	-106	50.3	2011-09-23	2011-10-28	36	67	29	2400	aut	songbirds	llg	37	9706	Emberizidae
snow bunting	f	-81.74	64.01	-106	50.3	2011-09-22	2011-10-28	37	NA	NA	NA	aut	songbirds	llg	37	9707	Emberizidae
snow bunting	m	-81.74	64.01	-106	50.3	2011-09-24	2011-10-28	35	80	26	2800	aut	songbirds	llg	37	9708	Emberizidae
snow bunting	m	-81.74	64.01	-106	50.3	2011-09-21	2011-10-31	41	63	36	2600	aut	songbirds	llg	37	9709	Emberizidae
snow bunting	m	-81.74	64.01	-106	50.3	2011-09-26	2011-10-28	33	68	NA	2250	aut	songbirds	llg	37	9710	Emberizidae
snow bunting	f	-81.74	64.01	-106	50.3	2011-10-02	2011-11-05	35	69	28	2400	aut	songbirds	llg	37	9711	Emberizidae
snow bunting	m	-81.74	64.01	-106	50.3	2011-09-29	2011-10-28	30	83	21	2500	aut	songbirds	llg	37	9712	Emberizidae
snow bunting	m	-81.74	64.01	-106	50.3	2011-09-25	2011-10-25	31	87	28	2700	aut	songbirds	llg	37	9713	Emberizidae
snow bunting	m	-81.74	64.01	-106	50.3	2011-09-23	2011-10-26	34	65	30	2200	aut	songbirds	llg	37	9714	Emberizidae
snow bunting	f	-81.74	64.01	-106	50.3	2011-09-22	2011-10-26	35	84	30	2950	aut	songbirds	llg	37	9715	Emberizidae
snow bunting	f	-81.74	64.01	-106	50.3	2011-09-22	2011-10-26	35	77	30	2700	aut	songbirds	llg	37	9716	Emberizidae
snow bunting	m	-81.74	64.01	-106	50.3	2011-09-26	2011-10-19	25	112	19	2800	aut	songbirds	llg	37	9717	Emberizidae
snow bunting	m	-81.74	64.01	-106	50.3	2011-09-29	2011-10-27	29	90	21	2600	aut	songbirds	llg	37	9718	Emberizidae
snow bunting	m	-81.74	64.01	-106	50.3	2011-09-21	2011-11-03	44	52	38	2300	aut	songbirds	llg	37	9719	Emberizidae
snow bunting	m	-81.74	64.01	-106	50.3	2012-05-09	2012-05-24	16	119	12	1900	spr	songbirds	llg	37	9700	Emberizidae
snow bunting	f	-81.74	64.01	-106	50.3	2012-05-10	2012-05-29	20	115	15	2300	spr	songbirds	llg	37	9701	Emberizidae
snow bunting	f	-81.74	64.01	-106	50.3	2012-05-05	2012-05-29	25	76	20	1900	spr	songbirds	llg	37	9702	Emberizidae
snow bunting	f	-81.74	64.01	-106	50.3	2012-05-08	2012-05-30	23	91	19	2100	spr	songbirds	llg	37	9703	Emberizidae
snow bunting	m	-81.74	64.01	-106	50.3	2012-05-04	2012-05-26	23	100	15	2300	spr	songbirds	llg	37	9704	Emberizidae
snow bunting	f	-81.74	64.01	-106	50.3	2012-04-27	2012-05-29	33	73	25	2400	spr	songbirds	llg	37	9705	Emberizidae
snow bunting	m	-81.74	64.01	-106	50.3	2012-05-09	2012-05-20	12	192	7	2300	spr	songbirds	llg	37	9706	Emberizidae
snow bunting	f	-81.74	64.01	-106	50.3	2012-05-08	2012-06-10	34	59	30	2000	spr	songbirds	llg	37	9707	Emberizidae
snow bunting	m	-81.74	64.01	-106	50.3	NA	NA	NA	NA	NA	NA	spr	songbirds	llg	37	9708	Emberizidae
snow bunting	m	-81.74	64.01	-106	50.3	NA	NA	NA	NA	NA	NA	spr	songbirds	llg	37	9709	Emberizidae
snow bunting	m	-81.74	64.01	-106	50.3	2012-05-27	2012-06-20	24	125	18	3000	spr	songbirds	llg	37	9710	Emberizidae
snow bunting	f	-81.74	64.01	-106	50.3	2012-05-10	2012-06-11	33	55	30	1800	spr	songbirds	llg	37	9711	Emberizidae
snow bunting	m	-81.74	64.01	-106	50.3	2012-05-03	2012-05-30	28	64	24	1800	spr	songbirds	llg	37	9712	Emberizidae
snow bunting	m	-81.74	64.01	-106	50.3	2012-05-17	2012-05-25	9	211	5	1900	spr	songbirds	llg	37	9713	Emberizidae
snow bunting	m	-81.74	64.01	-106	50.3	2012-05-06	2012-06-07	33	58	13	1900	spr	songbirds	llg	37	9714	Emberizidae
snow bunting	f	-81.74	64.01	-106	50.3	2012-05-18	2012-05-25	8	262	5	2100	spr	songbirds	llg	37	9715	Emberizidae
snow bunting	f	-81.74	64.01	-106	50.3	2012-05-16	2012-05-25	10	220	5	2200	spr	songbirds	llg	37	9716	Emberizidae
snow bunting	m	-81.74	64.01	-106	50.3	2012-05-07	2012-05-23	17	141	11	2400	spr	songbirds	llg	37	9717	Emberizidae
snow bunting	m	-81.74	64.01	-106	50.3	2012-05-04	2012-05-29	26	79	21	2050	spr	songbirds	llg	37	9718	Emberizidae
snow bunting	m	-81.74	64.01	-106	50.3	2012-04-27	2012-05-22	26	88	22	2300	spr	songbirds	llg	37	9719	Emberizidae
blackpoll warbler	NA	-68	44	-68	11	2013-10-13	2013-10-18	6	650	3	3900	aut	songbirds	llg	15.3	4600	Parulidae
blackpoll warbler	NA	-68	44	-68	11	2013-10-01	2013-11-24	24	158	20	3792	aut	songbirds	llg	15.3	4601	Parulidae
blackpoll warbler	NA	-68	44	-68	11	2013-09-25	2013-10-08	14	264	10	3700	aut	songbirds	llg	15.3	4602	Parulidae
blackpoll warbler	NA	-68	44	-68	11	2011-10-21	2013-11-01	11	344	8	3784	aut	songbirds	llg	15.3	4603	Parulidae
blackpoll warbler	NA	-68	44	-68	11	2011-11-04	15/11/20131	12	327	10	3924	aut	songbirds	llg	15.3	4604	Parulidae
blackpoll warbler	NA	-68	44	-68	11	2014-05-07	2014-05-26	20	224	10	4487	spr	songbirds	llg	15.3	4600	Parulidae
blackpoll warbler	NA	-68	44	-68	11	2014-04-22	2013-05-19	28	152	20	4247	spr	songbirds	llg	15.3	4601	Parulidae
blackpoll warbler	NA	-68	44	-68	11	NA	NA	NA	NA	NA	NA	spr	songbirds	llg	15.3	4602	Parulidae
blackpoll warbler	NA	-68	44	-68	11	NA	NA	NA	NA	NA	NA	spr	songbirds	llg	15.3	4603	Parulidae
blackpoll warbler	NA	-68	44	-68	11	2014-05-01	2014-05-20	20	216	NA	4316	spr	songbirds	llg	15.3	4604	Parulidae
chestnutcollared longspur	m	-109.121	40.203	-104.78	29.03	2012-09-30	2012-11-04	35	28	NA	963.512	aut	songbirds	llg	20	19740	Calcariidae
chestnutcollared longspur	m	-109.121	40.203	-104.78	29.03	2013-10-05	2013-11-30	56	23	NA	1285.71	aut	songbirds	llg	20	19741	Calcariidae
chestnutcollared longspur	m	-109.121	40.203	-104.78	29.03	2013-10-07	2013-11-03	27	73	NA	1976.23	aut	songbirds	llg	20	19742	Calcariidae
chestnutcollared longspur	m	-109.121	40.203	-104.78	29.03	2014-10-02	2014-11-01	30	36	NA	1077.67	aut	songbirds	llg	20	19743	Calcariidae
chestnutcollared longspur	m	-109.121	40.203	-104.78	29.03	2014-09-22	2014-11-07	46	30	NA	1357.05	aut	songbirds	llg	20	19744	Calcariidae
chestnutcollared longspur	m	-109.121	40.203	-104.78	29.03	2014-10-13	2014-12-04	52	24	NA	1250.23	aut	songbirds	llg	20	19745	Calcariidae
chestnutcollared longspur	m	-109.121	40.203	-104.78	29.03	2013-03-21	2013-05-02	42	23	NA	963.512	spr	songbirds	llg	20	19740	Calcariidae
chestnutcollared longspur	m	-109.121	40.203	-104.78	29.03	2014-03-26	2014-05-05	40	32	NA	1285.71	spr	songbirds	llg	20	19741	Calcariidae
chestnutcollared longspur	m	-109.121	40.203	-104.78	29.03	2014-02-22	2014-04-22	59	33	NA	1976.23	spr	songbirds	llg	20	19742	Calcariidae
chestnutcollared longspur	m	-109.121	40.203	-104.78	29.03	NA	NA	NA	NA	NA	1077.67	spr	songbirds	llg	20	19743	Calcariidae
chestnutcollared longspur	m	-109.121	40.203	-104.78	29.03	2015-03-18	2015-04-15	28	48	NA	1357.05	spr	songbirds	llg	20	19744	Calcariidae
chestnutcollared longspur	m	-109.121	40.203	-104.78	29.03	NA	NA	NA	NA	NA	1250.23	spr	songbirds	llg	20	19745	Calcariidae
willow warbler	m	-109.121	40.203	-104.78	29.03	2014-08-14	2014-10-05	52	89	NA	4653.77	aut	songbirds	llg	10.45	14760	Phylloscopidae
willow warbler	m	-109.121	40.203	-104.78	29.03	2014-08-13	2014-11-13	92	59	NA	5460.14	aut	songbirds	llg	10.45	14761	Phylloscopidae
willow warbler	m	-109.121	40.203	-104.78	29.03	2014-07-26	2014-10-25	91	57	NA	5176.46	aut	songbirds	llg	10.45	14762	Phylloscopidae
willow warbler	m	-109.121	40.203	-104.78	29.03	2014-08-01	2014-09-29	59	74	NA	4372.47	aut	songbirds	llg	10.45	14763	Phylloscopidae
willow warbler	m	-109.121	40.203	-104.78	29.03	2014-08-16	2014-10-08	53	128	NA	6786.66	aut	songbirds	llg	10.45	14764	Phylloscopidae
willow warbler	m	-109.121	40.203	-104.78	29.03	2014-08-16	2014-10-12	57	118	NA	6701.33	aut	songbirds	llg	10.45	14765	Phylloscopidae
willow warbler	m	-109.121	40.203	-104.78	29.03	2014-08-01	2014-10-18	78	92	NA	7156.1	aut	songbirds	llg	10.45	14766	Phylloscopidae
willow warbler	m	-109.121	40.203	-104.78	29.03	2014-07-21	2014-09-29	70	98	NA	6868.62	aut	songbirds	llg	10.45	14767	Phylloscopidae
willow warbler	m	-109.121	40.203	-104.78	29.03	2014-08-17	2014-10-16	60	122	NA	7319.57	aut	songbirds	llg	10.45	14768	Phylloscopidae
willow warbler	m	-109.121	40.203	-104.78	29.03	2015-07-24	2015-10-07	75	88	NA	6596.55	aut	songbirds	llg	10.45	14769	Phylloscopidae
willow warbler	m	-109.121	40.203	-104.78	29.03	2015-07-24	2015-10-09	77	55	NA	4229.9	aut	songbirds	llg	10.45	14770	Phylloscopidae
willow warbler	m	-109.121	40.203	-104.78	29.03	2015-08-13	2015-10-02	50	144	NA	7184.12	aut	songbirds	llg	10.45	14771	Phylloscopidae
willow warbler	m	-109.121	40.203	-104.78	29.03	2015-07-18	2015-09-18	62	121	NA	7477.13	aut	songbirds	llg	10.45	14772	Phylloscopidae
willow warbler	m	-109.121	40.203	-104.78	29.03	2015-08-03	2015-10-21	79	77	NA	6098.48	aut	songbirds	llg	10.45	14773	Phylloscopidae
willow warbler	m	-109.121	40.203	-104.78	29.03	2015-07-25	2015-10-10	77	62	NA	4788.11	aut	songbirds	llg	10.45	14774	Phylloscopidae
golden-winged warbler	m	-91.291	47.48	-86.05	13.23	2015-09-28	2015-10-29	31	124	NA	3853.53	aut	songbirds	llg	9.5	29760	Parulidae
golden-winged warbler	m	-91.291	47.48	-86.05	13.23	2015-09-05	2015-10-26	51	75	NA	3834.96	aut	songbirds	llg	9.5	29761	Parulidae
golden-winged warbler	m	-91.291	47.48	-86.05	13.23	2015-09-05	2015-10-27	52	75	NA	3890.58	aut	songbirds	llg	9.5	29762	Parulidae
golden-winged warbler	m	-91.291	47.48	-86.05	13.23	2015-08-07	2015-10-12	66	55	NA	3606.29	aut	songbirds	llg	9.5	29763	Parulidae
golden-winged warbler	m	-91.291	47.48	-86.05	13.23	2015-08-24	2015-10-28	65	59	NA	3838.72	aut	songbirds	llg	9.5	29764	Parulidae
golden-winged warbler	m	-91.291	47.48	-86.05	13.23	2015-09-05	2015-10-12	37	107	NA	3963.6	aut	songbirds	llg	9.5	29765	Parulidae
golden-winged warbler	m	-91.291	47.48	-86.05	13.23	2015-04-19	2015-05-15	26	148	NA	3853.53	spr	songbirds	llg	9.5	29760	Parulidae
golden-winged warbler	m	-91.291	47.48	-86.05	13.23	2015-04-07	2015-05-19	42	91	NA	3834.96	spr	songbirds	llg	9.5	29761	Parulidae
golden-winged warbler	m	-91.291	47.48	-86.05	13.23	2015-04-12	2015-05-10	28	139	NA	3890.58	spr	songbirds	llg	9.5	29762	Parulidae
golden-winged warbler	m	-91.291	47.48	-86.05	13.23	2015-04-16	2015-05-25	39	92	NA	3606.29	spr	songbirds	llg	9.5	29763	Parulidae
golden-winged warbler	m	-91.291	47.48	-86.05	13.23	2015-04-16	2015-05-20	34	113	NA	3838.72	spr	songbirds	llg	9.5	29764	Parulidae
golden-winged warbler	m	-91.291	47.48	-86.05	13.23	2015-04-14	2015-05-18	34	117	NA	3963.6	spr	songbirds	llg	9.5	29765	Parulidae
red-spotted bluethroat	m	15.7	50.7333	77.2	25.6	2012-09-10	2012-11-22	73	77	NA	5636.33	aut	songbirds	llg	19	9736	Muscicapidae
red-spotted bluethroat	m	15.7	50.7333	77.2	25.6	2012-08-10	2012-10-05	56	119	NA	6643.76	aut	songbirds	llg	19	9737	Muscicapidae
red-spotted bluethroat	m	15.7	50.7333	77.2	25.6	2012-09-07	2012-09-30	23	260	NA	5975.63	aut	songbirds	llg	19	9738	Muscicapidae
red-spotted bluethroat	m	15.7	50.7333	77.2	25.6	NA	NA	NA	NA	NA	5213.64	aut	songbirds	llg	19	9739	Muscicapidae
red-spotted bluethroat	m	15.7	50.7333	77.2	25.6	2013-04-08	2013-05-05	27	209	NA	5636.33	spr	songbirds	llg	19	9736	Muscicapidae
red-spotted bluethroat	m	15.7	50.7333	77.2	25.6	NA	NA	NA	NA	NA	6643.76	spr	songbirds	llg	19	9737	Muscicapidae
red-spotted bluethroat	m	15.7	50.7333	77.2	25.6	NA	NA	NA	NA	NA	5975.63	spr	songbirds	llg	19	9738	Muscicapidae
red-spotted bluethroat	m	15.7	50.7333	77.2	25.6	2013-04-09	2013-05-11	32	163	NA	5213.64	spr	songbirds	llg	19	9739	Muscicapidae
